# Supplementary material for: Development of core outcome sets for effectiveness trials of interventions to prevent and/or treat delirium (Del-COrS): study protocol
Source: PubMed Central journal article supplement — BMJ Open. 2017 Sep 18;7(9):e016371. doi: 10.1136/bmjopen-2017-016371 (PMC5623471; doi:10.1136/bmjopen-2017-016371), 2017-09-18
Supplement: bmjopen-2017-016371supp001.pdf [file bmjopen-2017-016371supp001.pdf]

## Appendix: Search Strategy: Medline

Patient Group 1: critically ill adults and children receiving care in high acuity settings, including intensive care and high dependency units

1 ((postoperati\* or post-operati\* or postsurg\* or post-surg\*) adj1 ("cognitive dysfunction" or "brain dysfunction")).tw,kw,kf.

2 Delirium/

3 deliri\*.tw,kw,kf.

4 Psychoses, Substance-Induced/

5 (psychos\* adj3 (toxic\* or exogenous\* or chemical\* or drug or drugs or medication\* or substance\*)).tw,kw,kf.

6 (acute brain adj (dysfunction\* or failure\* or syndrome\*)).tw,kw,kf.

7 (cloud\* adj3 consciousness\*).tw,kw,kf.

8 clouded state\*.tw,kw,kf.

9 ((psycho-organic syndrome\* or psychoorganic syndrome\* or organic psychosyndrome\* or organic psycho-syndrome\*) adj3 acute).tw,kw,kf.

10 exp Confusion/ci

11 Hallucinations/

12 hallucinat\*.tw,kw,kf.

13 or/1-12 [DELIRIUM]

14 exp Animals/ not (exp Animals/ and Humans/)

15 13 not 14 [ANIMAL-ONLY REMOVED]

16 Intensive Care Units/

17 Burn Units/

18 Coronary Care Units/

19 Respiratory Care Units/

20 exp Intensive Care Units, Pediatric/

21 exp Critical Care/

22 ((intensive or critical or acute) adj3 care).tw,kw,kf.

23 (ICU or ICUs or SICU or SICUs or CCU or CCUs).tw,kw,kf.

24 (PICU or PICUs or NICU or NICUs).tw,kw,kf.

25 (burn? adj3 (unit? or centre? or center?)).tw,kw,kf.

26 ((cardiac or coronary or heart) adj3 (unit? or centre? or center?)).tw,kw,kf.

27 (respiratory adj3 (unit? or centre? or center?)).tw,kw,kf.

28 ((surgical or surger\*) adj3 (unit? or centre? or center?)).tw,kw,kf.

29 (high dependency adj3 (unit? or centre? or center?)).tw,kw,kf.

30 ((stepdown or step-down) adj3 (unit? or centre? or center?)).tw,kw,kf.

31 (HDU or HDUs or SDU or SDUs or EDSDU or EDSDUs).tw,kw,kf.

32 ((special\* or dedicated or intens\*) adj weaning adj3 (unit? or centre? or center? or program\* or ward?)).tw,kw,kf.

33 Critical Illness/

34 (critical\* adj (ill or illness\*)).tw,kw,kf.

35 or/16-34

36 15 and 35 [DELIRIUM IN THE ICU]

37 limit 36 to yr="1980-current"

38 limit 37 to english language

2. Non-critically ill adults and children hospitalized in acute care settings including postoperative surgical and medical patients, those presenting to ED

- 1 ((postoperati\* or post-operati\* or postsurg\* or post-surg\*) adj1 ("cognitive dysfunction" or "brain dysfunction")).tw,kw,kf.
- 2 Delirium/
- 3 deliri\*.tw,kw,kf.
- 4 Psychoses, Substance-Induced/
- 5 (psychos\* adj3 (toxic\* or exogenous\* or chemical\* or drug or drugs or medication\* or substance\*)).tw,kw,kf.
- 6 (acute brain adj (dysfunction\* or failure\* or syndrome\*)).tw,kw,kf.
- 7 (cloud\* adj3 consciousness\*).tw,kw,kf.
- 8 clouded state\*.tw,kw,kf.
- 9 ((psycho-organic syndrome\* or psychoorganic syndrome\* or organic psychosyndrome\* or organic psycho-syndrome\*) adj3 acute).tw,kw,kf.
- 10 exp Confusion/ci
- 11 Hallucinations/
- 12 hallucinat\*.tw,kw,kf.
- 13 or/1-12 [DELIRIUM]
- 14 exp Animals/ not (exp Animals/ and Humans/)
- 15 13 not 14 [ANIMAL-ONLY REMOVED]
- 16 Inpatients/
- 17 inpatient\*.tw,kw,kf.
- 18 Adolescent, Hospitalized/
- 19 Child, Hospitalized/
- 20 exp Hospitalization/
- 21 Emergency Service, Hospital/
- 22 (emergency adj2 (care or center? or centre? or department? or dept? or room? or service? or unit or units or ward?)).tw,kw,kf.
- 23 (("A and E" or "A & E") adj2 (care or center? or centre? or department? or dept? or room? or service? or unit or units or ward?)).tw,kw,kf.
- 24 hospital\*.tw,kw,kf.
- 25 ((emergency or medical\* or surg\*) adj3 patient?).tw,kw,kf.
- 26 Postoperative Care/
- 27 ((postoperati\* or post-operati\* or postsurg\* or post-surg\*) adj3 (care or patient?)).tw,kw,kf.
- 28 or/16-27
- 29 15 and 28 [DELIRIUM IN INPATIENTS/HOSPITALIZED CARE]
- 30 limit 29 to yr="1980-CURRENT"
- 31 limit 30 to english language

3. Adults and children receiving palliative care, either in a hospital, hospice, or community setting  
1 ((postoperati\* or post-operati\* or postsurg\* or post-surg\*) adj1 ("cognitive dysfunction" or "brain dysfunction")).tw,kw,kf.  
2 Delirium/  
3 deliri\*.tw,kw,kf.  
4 Psychoses, Substance-Induced/  
5 (psychos\* adj3 (toxic\* or exogenous\* or chemical\* or drug or drugs or medication\* or substance\*)).tw,kw,kf.  
6 (acute brain adj (dysfunction\* or failure\* or syndrome\*)).tw,kw,kf.  
7 (cloud\* adj3 consciousness\*).tw,kw,kf.  
8 clouded state\*.tw,kw,kf.  
9 ((psycho-organic syndrome\* or psychoorganic syndrome\* or organic psychosyndrome\* or organic psycho-syndrome\*) adj3 acute).tw,kw,kf.  
10 exp Confusion/ci  
11 Hallucinations/  
12 hallucinat\*.tw,kw,kf.  
13 or/1-12 [DELIRIUM]  
14 exp Animals/ not (exp Animals/ and Humans/)  
15 13 not 14 [ANIMAL-ONLY REMOVED]  
16 Inpatients/  
17 inpatient\*.tw,kw,kf.  
18 Adolescent, Hospitalized/  
19 Child, Hospitalized/  
20 exp Hospitalization/  
21 Emergency Service, Hospital/  
22 (emergency adj2 (care or center? or centre? or department? or dept? or room? or service? or unit or units or ward?)).tw,kw,kf.  
23 (("A and E" or "A & E") adj2 (care or center? or centre? or department? or dept? or room? or service? or unit or units or ward?)).tw,kw,kf.  
24 hospital\*.tw,kw,kf.  
25 ((emergency or medical\* or surg\*) adj3 patient?).tw,kw,kf.  
26 Postoperative Care/  
27 ((postoperati\* or post-operati\* or postsurg\* or post-surg\*) adj3 (care or patient?)).tw,kw,kf.  
28 or/16-27  
29 15 and 28 [DELIRIUM IN INPATIENTS/HOSPITALIZED CARE]  
30 limit 29 to yr="1980-CURRENT"  
31 limit 30 to english language

4. Older adults (65 and over) living in nursing or residential care homes or living in their own homes and defined as at risk of delirium by study authors.
- 1 ((postoperati\* or post-operati\* or postsurg\* or post-surg\*) adj1 ("cognitive dysfunction" or "brain dysfunction")).tw,kw,kf.
- 2 Delirium/
- 3 deliri\*.tw,kw,kf.
- 4 Psychoses, Substance-Induced/
- 5 (psychos\* adj3 (toxic\* or exogenous\* or chemical\* or drug or drugs or medication\* or substance\*)).tw,kw,kf.
- 6 (acute brain adj (dysfunction\* or failure\* or syndrome\*)).tw,kw,kf.
- 7 (cloud\* adj3 consciousness\*).tw,kw,kf.
- 8 clouded state\*.tw,kw,kf.
- 9 ((psycho-organic syndrome\* or psychoorganic syndrome\* or organic psychosyndrome\* or organic psycho-syndrome\*) adj3 acute).tw,kw,kf.
- 10 exp Confusion/ci
- 11 Hallucinations/
- 12 hallucinat\*.tw,kw,kf.
- 13 or/1-12 [DELIRIUM]
- 14 exp Animals/ not (exp Animals/ and Humans/)
- 15 13 not 14 [ANIMAL-ONLY REMOVED]
- 16 exp Aged/
- 17 Health Services for the Aged/
- 18 (geriatric\* or psychogeriatric\* or psycho-geriatric\* or gerontolog\* or elder\$2 or old-age? or senior\*).tw,kw,kf.
- 19 (older adj2 (adult? or age? or female? or male? or man or men or patient? or person? or people? or population? or resident? or woman\* or women\*)).tw,kw,kf.
- 20 Homes for the Aged/
- 21 ((facility or facilities or home or homes) adj "for the aged").tw,kw,kf.
- 22 exp Nursing homes/
- 23 nursing home?.tw,kw,kf.
- 24 (nursing facility or nursing facilities).tw,kw,kf.
- 25 care home?.tw,kw,kf.
- 26 (care facility or care facilities).tw,kw,kf.
- 27 (residen\* adj1 (care or health care or healthcare)).tw,kw,kf.
- 28 ((care or healthcare or service?) adj "for the aged").tw,kw,kf.
- 29 (aged care or aged healthcare or aged health care or aged service?).tw,kw,kf.
- 30 or/16-29
- 31 15 and 30 [DELIRIUM IN THE ELDERLY]
- 32 limit 31 to yr="1980-CURRENT"
- 33 limit 32 to english language
